# Supplementary material for: Nonsteroidal anti-inflammatory drugs using and risk of head and neck cancer: a dose–response meta analysis of prospective cohort studies
Source: PubMed Central journal article supplement (PMC5716792; doi:10.18632/oncotarget.21524), 2017-10-05
Supplement: oncotarget-08-99066-s001.pdf [file oncotarget-08-99066-s001.pdf]

## Nonsteroidal anti-inflammatory drugs using and risk of head and neck cancer: a dose–response meta analysis of prospective cohort studies

### SUPPLEMENTARY MATERIALS

**Supplementary Table 1: Sensitivity analysis of the meta-analysis**

| Deleted one study         | Relative risk (95% CI) | <i>P</i> for heterogeneity | I <sup>2</sup> | <i>P</i> for test |
|---------------------------|------------------------|----------------------------|----------------|-------------------|
| Ahmadi et al. (2010)      | 0.90 (0.83–0.98)       | 0.182                      | 43.5%          | 0.013             |
| Becker et al. (2015)      | 0.85 (0.77–0.94)       | 0.240                      | 27.5%          | 0.002             |
| Bosetti et al. (2003)     | 0.89 (0.82–0.98)       | 0.034                      | 62.5%          | 0.012             |
| Di et al. (2015)          | 0.90 (0.83–0.98)       | 0.091                      | 60.4%          | 0.014             |
| Friis et al. (2006)       | 0.89 (0.83–0.97)       | 0.177                      | 45.1%          | 0.002             |
| Friis et al. (2003)       | 0.86 (0.79–0.95)       | 0.092                      | 59.5%          | 0.005             |
| Jayaprakash et al. (2006) | 0.82 (0.74–0.90)       | 0.000                      | 66.3%          | < 0.001           |
| Macfarlane et al. (2012)  | 0.83 (0.76–0.95)       | 0.296                      | 10.6%          | 0.002             |
| Macfarlane et al. (2014)  | 0.90 (0.81–0.99)       | 0.164                      | 48.5%          | 0.003             |
| Macfarlane et al. (2015)  | 0.81 (0.75–0.94)       | 0.087                      | 53.1%          | 0.001             |
| Wilson et al. (2013)      | 0.82 (0.76–0.96)       | 0.034                      | 62.9%          | 0.003             |

**Supplementary Table 2: Publication bias analysis of the meta-analysis**

|             | Test         | <i>t</i> | 95% CI      | <i>P</i> |
|-------------|--------------|----------|-------------|----------|
| Total       | Begg's test  |          |             | 0.245    |
|             | Egger's test | –1.28    | –2.12, 0.48 | 0.211    |
| Aspirin Use | Begg's test  |          |             | 0.215    |
|             | Egger's test | –1.01    | –2.47, 0.86 | 0.326    |
| NSAIDs      | Begg's test  |          |             | 0.755    |
|             | Egger's test | –0.85    | –4.03, 1.82 | 0.415    |
